# Supplementary material for: Contamination by Aflatoxins B/G in Food and Commodities Imported in Southern Italy from 2017 to 2020: A Risk-Based Evaluation
Source: MDPI journal article supplement (doi:10.3390/toxins13060368), 2021-05-22
Supplement: s1 [file s1]

# Supplementary Materials: Contamination by Aflatoxins B/G in Food and Commodities Imported in Southern Italy from 2017 to 2020: A Risk-Based Evaluation

Pasquale Gallo, Samantha Imbimbo, Silvana Alvino, Vincenzo Castellano, Olga Arace, Vittorio Soprano, Mauro Esposito, Francesco Paolo Serpe and Donato Sansone

**Table S1.** The results of validation studies for determination of AF B/G in several food.

| Food                                         | Validation Parameter                                                        | AF B1   | AF B2   | AF G1   | AF G2  |
|----------------------------------------------|-----------------------------------------------------------------------------|---------|---------|---------|--------|
| nuts, cereals,<br>dried fruit<br>oilseeds    | trueness, mean recoveries at 1,0 µg/kg                                      | 101,70% | 102,80% | 100,30% | 98,30% |
|                                              | trueness, mean recoveries at 5,0 µg/kg                                      | 87,70%  | 97,70%  | 93,50%  | 88,90% |
|                                              | trueness, mean recoveries at 15,0 µg/kg                                     | 90,20%  | 96,00%  | 92,70%  | 91,80% |
|                                              | repeatability at 1,0 µg/kg , RSD <sub>r</sub> , n = 6                       | 3,50%   | 5,70%   | 6,90%   | 5,40%  |
|                                              | repeatability at 5,0 µg/kg , RSD <sub>r</sub> , n = 6                       | 3,80%   | 1,40%   | 1,80%   | 6,10%  |
|                                              | repeatability at 15,0 µg/kg ,RSD <sub>r</sub> , n = 6                       | 4,90%   | 1,10%   | 1,70%   | 3,30%  |
|                                              | within-laboratory reproducibility at 1,0 µg/kg , RSD <sub>R</sub> , n = 16  | 6,80%   | 5,70%   | 6,00%   | 10,80% |
|                                              | within-laboratory reproducibility at 5,0 µg/kg , RSD <sub>R</sub> , n = 16  | 8,00%   | 11,60%  | 6,60%   | 14,70% |
|                                              | within-laboratory reproducibility at 10,0 µg/kg , RSD <sub>R</sub> , n = 16 | 6,90%   | 11,20%  | 5,80%   | 10,30% |
| spices, potherb                              | trueness, mean recoveries at 2,0 µg/kg                                      | 93,50%  | 87,40%  | 84,40%  | 67,90% |
|                                              | trueness, mean recoveries at 5,0 µg/kg                                      | 99,00%  | 91,80%  | 90,50%  | 70,20% |
|                                              | trueness, mean recoveries at 15,0 µg/kg                                     | 98,10%  | 93,60%  | 98%     | 78,30% |
|                                              | repeatability at 2,0 µg/kg , RSD <sub>r</sub> , n = 6                       | 16,00%  | 13,70%  | 8,60%   | 13,30% |
|                                              | repeatability at 5,0 µg/kg , RSD <sub>r</sub> , n = 6                       | 16,10%  | 15,30%  | 12,00%  | 14,00% |
|                                              | repeatability at 15,0 µg/kg ,RSD <sub>r</sub> , n = 6                       | 12,40%  | 17,80%  | 9,80%   | 10,50% |
|                                              | within-laboratory reproducibility at 2,0 µg/kg , RSD <sub>R</sub> , n = 12  | 12,80%  | 11,50%  | 8,20%   | 10,90% |
|                                              | within-laboratory reproducibility at 5,0 µg/kg , RSD <sub>R</sub> , n = 12  | 14,30%  | 14,60%  | 11,00%  | 12,50% |
| bakery<br>products,<br>vegetable<br>extracts | within-laboratory reproducibility at 15,0 µg/kg , RSD <sub>R</sub> , n = 12 | 10,80%  | 15,10%  | 8,20%   | 7,60%  |
|                                              | trueness, mean recoveries at 0,25 µg/kg                                     | 113,30% | 100,00% | 106,70% | 67,30% |
|                                              | trueness, mean recoveries at 2,0 µg/kg                                      | 95,80%  | 90,70%  | 93,80%  | 95,00% |
|                                              | trueness, mean recoveries at 4,0 µg/kg                                      | 98,90%  | 99,10%  | 96,10%  | 90,20% |
|                                              | repeatability at 0,25 µg/kg , RSD <sub>r</sub> , n = 6                      | 5,30%   | 9,10%   | 5,10%   | 8,70%  |
|                                              | repeatability at 2,0 µg/kg , RSD <sub>r</sub> , n = 6                       | 5,90%   | 4,00%   | 9,00%   | 7,30%  |
| hazelnut meals                               | repeatability at 4,0 µg/kg ,RSD <sub>r</sub> , n = 6                        | 6,10%   | 9,80%   | 4,70%   | 7,80%  |
|                                              | trueness, mean recoveries at 1,0 µg/kg                                      | 90,30%  | 84,80%  | 97,30%  | 75,70% |
|                                              | trueness, mean recoveries at 15,0 µg/kg                                     | 91,00%  | 91,40%  | 96,90%  | 83,70% |
|                                              | repeatability at 1,0 µg/kg , RSD <sub>r</sub> , n = 6                       | 3,00%   | 5,80%   | 7,70%   | 6,40%  |
|                                              | repeatability at 15,0 µg/kg ,RSD <sub>r</sub> , n = 6                       | 3,70%   | 2,30%   | 2,80%   | 8,20%  |

|                                                                               |                                                                            |        |        |        |        |
|-------------------------------------------------------------------------------|----------------------------------------------------------------------------|--------|--------|--------|--------|
| within-laboratory reproducibility at 1,0 µg/kg , RSD <sub>R</sub> ,<br>n = 8  |                                                                            | 2,90%  | 7,90%  | 10,10% | 12,60% |
| within-laboratory reproducibility at 15,0 µg/kg ,<br>RSD <sub>R</sub> , n = 8 |                                                                            | 3,30%  | 5,50%  | 4,30%  | 20,60% |
| cereals, nuts,<br>dried fruit,<br>oilseeds                                    | LOQ, µg/kg                                                                 | 0,25   | 0,25   | 0,25   | 0,25   |
| bakery<br>products,<br>vegetable<br>extracts                                  | LOD, µg/kg                                                                 | 0,25   | 0,25   | 0,25   | 0,25   |
| spices, potherb                                                               | LOQ, µg/kg                                                                 | 2,0    | 2,0    | 2,0    | 2,0    |
|                                                                               | LOD, µg/kg                                                                 | 0,42   | 0,42   | 0,42   | 0,42   |
| hazelnut meals                                                                | LOQ, µg/kg                                                                 | 1,0    | 1,0    | 1,0    | 1,0    |
|                                                                               | LOD, µg/kg                                                                 | 0,25   | 0,25   | 0,25   | 0,25   |
| all food                                                                      | linearity of detector signal, standard calibration curve<br>R <sup>2</sup> | ≥ 0,99 | ≥ 0,99 | ≥ 0,99 | ≥ 0,99 |
